# Supplementary material for: Early detection of viable Francisella tularensis in environmental matrices by culture-based PCR
Source: BMC Microbiol. 2020 Mar 25;20:66. doi: 10.1186/s12866-020-01748-0 (PMC7093956; doi:10.1186/s12866-020-01748-0)
Supplement: Supplementary file 2 — Additional file 2: STable.F. tularensis resting cell concentrations [file 12866_2020_1748_MOESM2_ESM.xlsx]

## Sheet: Sheet1 (2)
Supplemental Table. F. tularensis resting cell concentrations
Experiment	Strain		Resting Cell Concentrations log10 CFU mL-1
			Before 4 °C incubation						After 4 °C 24 h incubation
			Replicates			mean	SD		Replicates			mean	SD
Inactivated target cells	LVS		-	-	-				-	-	-
	IN99		6.6	6.7	6.6	6.63333	0.057735		6.5	6.8	6.7	6.66667	0.152753
	Schu4		7.4	7.4	7.5	7.43333	0.057735		7.3	7.4	7.2	7.3	0.1
Well Water	LVS		7.6	7.6	7.5	7.56667	0.057735		7.5	7.5	7.6	7.53333	0.057735
	IN99		7.3	7.3	7.3	7.3	0		7.1	7.4	7.3	7.26667	0.152753
	Schu4		7.6	7.7	7.6	7.63333	0.057735		7.5	7.6	7.7	7.6	0.1
Drinking Water	LVS		7.5	7.3	7.3	7.36667	0.11547		7.4	7.5	7.4	7.43333	0.057735
	IN99		7.6	7.7	7.8	7.7	0.1		7.6	7.7	7.7	7.66667	0.057735
	Schu4		7.6	7.3	7.4	7.43333	0.152753		7.4	7.4	7.4	7.4	1.08779e-15
Humic Acid	LVS		7.8	7.9	7.8	7.83333	0.057735		7.6	7.4	7.4	7.46667	0.11547
	IN99		6.8	6.7	6.5	6.66667	0.152753		6.5	6.7	6.6	6.6	0.1
	Schu4		-	-	-	-	-		6.3	6.5	6.6	6.46667	0.152753
Arizona Test Dust	LVS		7.6	7.5	7.6	7.56667	0.057735		7.5	7.4	7.6	7.5	0.1
	IN99		-	-	-	-	-		-	-	-	-	-
	Schu4		-	-	-	-	-		-	-	-	-	-
"-", not performed.
SD, standard deviation.
